# Supplementary material
Source: PubMed Central journal article supplement (PMC8277080)

**Table S1.** Details of included diseases; International Classification of Diseases 10th revision (ICD-10) codes included from inpatient hospital records

|                                       | <b>ICD-10 Codes</b>                                                         |
|---------------------------------------|-----------------------------------------------------------------------------|
| Coronary artery disease               | I20–I25                                                                     |
| Atrial fibrillation                   | I48                                                                         |
| Stroke                                | G45-G46; I61; I63                                                           |
| Hypertension                          | I10-I15                                                                     |
| Diabetes (Type 2)                     | E11                                                                         |
| Chronic kidney disease                | N18; N183; N184; N185; Y841                                                 |
| Depression                            | F32; F33; F34.1                                                             |
| Dementia                              | F00; F01; F02; F03; G30                                                     |
| Asthma                                | J45-J46                                                                     |
| Chronic obstructive pulmonary disease | J42-J44                                                                     |
| Osteoporosis                          | M80; M81; M811; M812; M813; M814; M815; M816; M818; M819                    |
| Osteoarthritis                        | M15.0; M15.1; M15.2; M15.9; M16.0; M16.1; M17.0; M17.1; M18.0; M18.1; M19.0 |
| Liver disease                         | K70-K77                                                                     |
| Delirium                              | F05                                                                         |
| Pneumonia                             | J13; J14; J15; J16; J17; J18                                                |
| Falls/Fragility fractures             | W00; W01; W04; W05; W06; W07; W08; W10; W17; W18; W19; R296                 |
|                                       | S220; S32; S325; S328; S422-S424; S524; S525; S720-S722; S582; S5823; T08   |

**Table S2.** Models for COVID-19 inpatient test positivity and COVID-19 related mortality with inpatient test-confirmed COVID-19: M6 and M7

|                                                                 | M6: age at the pandemic (3/16/2020) + pre-existing diseases or conditions to March 2020 + PhenoAgeAccel at baseline |                                                                    | M7: age at the pandemic (3/16/2020) + pre-existing diseases or conditions to March 2020 + PhenoAge biomarkers |                                                                    |
|-----------------------------------------------------------------|---------------------------------------------------------------------------------------------------------------------|--------------------------------------------------------------------|---------------------------------------------------------------------------------------------------------------|--------------------------------------------------------------------|
|                                                                 | Positive (n=613) vs. untested or negative (n=338,672)                                                               | Positive dead vs. positive alive, untested or negative (n=338,108) | Positive (n=613) vs. untested or negative (n=338,672)                                                         | Positive dead vs. positive alive, untested or negative (n=338,108) |
| Sex <sup>1</sup> (=Male)                                        | <b>1.37 (1.16, 1.62)</b><br>p=2.0e-04                                                                               | <b>1.66 (1.17, 2.37)</b><br>p=4.6e-03                              | <b>1.46 (1.20, 1.79)</b><br>p=2.2e-04                                                                         | <b>2.12 (1.41, 3.2)</b><br>p=3.2e-04                               |
| Ethnicity <sup>2</sup>                                          |                                                                                                                     |                                                                    |                                                                                                               |                                                                    |
| Black                                                           | <b>2.56 (1.69, 3.86)</b><br>p=8.1e-06                                                                               | 2.34 (0.98, 5.59)<br>p=0.055                                       | <b>2.23 (1.44, 3.44)</b><br>p=3e-04                                                                           | <b>2.65 (1.08, 6.54)</b><br>p=0.034                                |
| Other (incl. Asian, Chinese, and Mixed)                         | <b>1.82 (1.31, 2.52)</b><br>p=3.3e-04                                                                               | 1.42 (0.67, 3.02)<br>p=0.37                                        | <b>1.67 (1.2, 2.34)</b><br>p=2.6e-03                                                                          | 1.45 (0.67, 3.13)<br>p=0.34                                        |
| Age at the pandemic (per 5 years)                               | 0.95 (0.90, 1.01)<br>p=0.09                                                                                         | <b>1.48 (1.28, 1.71)</b><br>p=1.7e-07                              | <b>0.94 (0.88, 0.99)</b><br>p=2.2e-02                                                                         | <b>1.45 (1.25, 1.68)</b><br>p=1e-06                                |
| PhenoAgeAccel (per 5 years)                                     | <b>1.10 (1.02, 1.19)</b><br>p=0.016                                                                                 | <b>1.21 (1.04, 1.40)</b><br>p=0.011                                |                                                                                                               |                                                                    |
| Albumin                                                         |                                                                                                                     |                                                                    | <b>0.87 (0.80, 0.94)</b><br>p=5.9e-4                                                                          | 0.88 (0.75, 1.04)<br>p=0.12                                        |
| Creatinine                                                      |                                                                                                                     |                                                                    | 1.04 (0.95, 1.14)<br>p=0.43                                                                                   | 0.87 (0.73, 1.04)<br>p=0.12                                        |
| Glucose                                                         |                                                                                                                     |                                                                    | 0.98 (0.91, 1.05)<br>p=0.55                                                                                   | 1.03 (0.92, 1.16)<br>p=0.61                                        |
| log(CRP)                                                        |                                                                                                                     |                                                                    | <b>1.10 (1.01, 1.20)</b><br>p=0.037                                                                           | 1.12 (0.94, 1.34)<br>p=0.21                                        |
| Lymphocyte percent                                              |                                                                                                                     |                                                                    | 1.05 (0.97, 1.14)<br>p=0.26                                                                                   | 0.96 (0.82, 1.14)<br>p=0.66                                        |
| Mean corpuscular volume                                         |                                                                                                                     |                                                                    | 0.97 (0.89, 1.05)<br>p=0.40                                                                                   | 1.12 (0.95, 1.31)<br>p=0.17                                        |
| RDW                                                             |                                                                                                                     |                                                                    | 1.01 (0.93, 1.09)<br>p=0.83                                                                                   | 1.13 (0.97, 1.31)<br>p=0.11                                        |
| Alkaline phosphatase                                            |                                                                                                                     |                                                                    | 1.04 (0.96, 1.13)<br>p=0.31                                                                                   | 1.07 (0.91, 1.26)<br>p=0.39                                        |
| White blood cell count                                          |                                                                                                                     |                                                                    | 1.02 (0.97, 1.07)<br>p=0.46                                                                                   | 1.02 (0.93, 1.12)<br>p=0.65                                        |
| Dementia (n <sub>1</sub> =60; n <sub>2</sub> =31)               | <b>5.62 (4.04, 7.82)</b><br>p=1.2e-24                                                                               | <b>7.35 (4.46, 12.11)</b><br>p=4.7e-15                             | <b>5.80 (4.17, 8.06)</b><br>p=1.9e-25                                                                         | <b>7.46 (4.53, 12.29)</b><br>p=2.7e-15                             |
| Type II diabetes (n <sub>1</sub> =131; n <sub>2</sub> =52)      | <b>1.54 (1.23, 1.93)</b><br>p=2.1e-04                                                                               | <b>1.80 (1.21, 2.67)</b><br>p=3.7e-03                              | <b>1.61 (1.27, 2.06)</b><br>p=1.1e-04                                                                         | <b>1.88 (1.23, 2.88)</b><br>p=3.8e-03                              |
| History of pneumonia (n <sub>1</sub> =112; n <sub>2</sub> =41)  | <b>2.24 (1.76, 2.84)</b><br>p=3.9e-11                                                                               | <b>2.20 (1.43, 3.39)</b><br>p=3.3e-04                              | <b>2.19 (1.73, 2.79)</b><br>p=1.3e-10                                                                         | <b>2.11 (1.37, 3.25)</b><br>p=7.3e-04                              |
| Depression (n <sub>1</sub> =104; n <sub>2</sub> =31)            | <b>1.37 (1.09, 1.72)</b><br>p=6.1e-03                                                                               | 1.50 (0.97, 2.32)<br>p=0.068                                       | <b>1.35 (1.07, 1.69)</b><br>p=9.8e-03                                                                         | 1.46 (0.95, 2.26)<br>p=0.086                                       |
| Atrial fibrillation (n <sub>1</sub> =99; n <sub>2</sub> =36)    | <b>1.46 (1.14, 1.87)</b><br>p=2.7e-03                                                                               | 1.27 (0.83, 1.95)<br>p=0.26                                        | <b>1.46 (1.14, 1.87)</b><br>p=2.8e-03                                                                         | 1.26 (0.82, 1.92)<br>p=0.29                                        |
| Hypertension (n <sub>1</sub> =352; n <sub>2</sub> =118)         | <b>1.44 (1.19, 1.74)</b><br>p=1.3e-04                                                                               | <b>2.15 (1.41, 3.28)</b><br>p=3.5e-04                              | <b>1.43 (1.19, 1.73)</b><br>p=1.9e-04                                                                         | <b>2.16 (1.42, 3.29)</b><br>p=3.4e-04                              |
| COPD (n <sub>1</sub> =71; n <sub>2</sub> =29)                   | 1.18 (0.89, 1.57)<br>p=0.24                                                                                         | <b>1.61 (1.01, 2.57)</b><br>p=0.047                                | 1.17 (0.88, 1.55)<br>p=0.29                                                                                   | <b>1.54 (0.97, 2.47)</b><br>p=0.069                                |
| Chronic kidney disease (n <sub>1</sub> =72; n <sub>2</sub> =29) | <b>1.57 (1.18, 2.08)</b><br>p=1.7e-03                                                                               | 1.48 (0.93, 2.36)<br>p=0.10                                        | <b>1.56 (1.16, 2.10)</b><br>p=3.5e-03                                                                         | <b>1.84 (1.12, 3.03)</b><br>p=0.016                                |
| Liver disease (n <sub>1</sub> =36; n <sub>2</sub> =6)           | 1.25 (0.87, 1.78)<br>p=0.23                                                                                         | 0.58 (0.24, 1.37)<br>p=0.21                                        | 1.24 (0.87, 1.77)<br>p=0.24                                                                                   | 0.57 (0.24, 1.33)<br>p=0.19                                        |

|                                                                                  |                                       |                                     |                                       |                                     |
|----------------------------------------------------------------------------------|---------------------------------------|-------------------------------------|---------------------------------------|-------------------------------------|
| Rheumatoid Arthritis<br>(n <sub>1</sub> =26; n <sub>2</sub> =12)                 | 1.12 (0.74, 1.68)<br>p=0.60           | <b>1.46 (0.76, 2.82)</b><br>p=0.26  | 1.10 (0.73, 1.66)<br>p=0.66           | <b>1.39 (0.72, 2.67)</b><br>p=0.32  |
| Coronary artery disease<br>(n <sub>1</sub> =133; n <sub>2</sub> =47)             | 1.03 (0.82, 1.28)<br>p=0.83           | 0.96 (0.65, 1.43)<br>p=0.85         | 1.02 (0.81, 1.27)<br>p=0.89           | 0.97 (0.65, 1.44)<br>p=0.88         |
| Delirium<br>(n <sub>1</sub> =40; n <sub>2</sub> =19)                             | <b>1.79 (1.21, 2.66)</b><br>p=3.9e-03 | <b>1.85 (1.01, 3.39)</b><br>p=0.045 | <b>1.81 (1.22, 2.69)</b><br>p=3.2e-03 | <b>1.89 (1.04, 3.44)</b><br>p=0.038 |
| Stroke<br>(n <sub>1</sub> =30; n <sub>2</sub> =11)                               | <b>1.39 (0.94, 2.06)</b><br>p=0.10    | 1.26 (0.66, 2.43)<br>p=0.48         | 1.37 (0.93, 2.03)<br>p=0.12           | 1.24 (0.64, 2.38)<br>p=0.52         |
| Asthma<br>(n <sub>1</sub> =117; n <sub>2</sub> =24)                              | 1.09 (0.88, 1.35)<br>p=0.45           | 0.70 (0.44, 1.13)<br>p=0.14         | 1.07 (0.87, 1.33)<br>p=0.52           | 0.69 (0.43, 1.1)<br>p=0.12          |
| Previous falls/fragile<br>fractures<br>(n <sub>1</sub> =140; n <sub>2</sub> =48) | <b>1.85 (1.49, 2.31)</b><br>p=3.5e-08 | <b>1.65 (1.09, 2.50)</b><br>p=0.018 | <b>1.86 (1.49, 2.31)</b><br>p=3.2e-08 | <b>1.6 (1.05, 2.42)</b><br>p=0.027  |
| Osteoarthritis<br>(n <sub>1</sub> =80; n <sub>2</sub> =28)                       | 0.83 (0.65, 1.07)<br>p=0.15           | 0.89 (0.58, 1.37)<br>p=0.60         | 0.81 (0.64, 1.04)<br>p=0.10           | 0.87 (0.56, 1.34)<br>p=0.51         |

<sup>1</sup>reference: female; <sup>2</sup>reference: White; in bold if p<0.05; assessment center results skipped; n<sub>1</sub>: number of inpatient positives between March 16 and April 27, 2020; n<sub>2</sub>: number of COVID-19 related deaths following an inpatient positive result between March 16 and April 27, 2020

**Table S3.** Diagnostic values when the sensitivity is controlled at 0.6, or 0.8 for inpatient test positivity or COVID-19 mortality with inpatient test-confirmed COVID-19

| Model                                                             | AUC   | Threshold | SEN   | SPEC  | PPV     | NPV     |
|-------------------------------------------------------------------|-------|-----------|-------|-------|---------|---------|
| Inpatient test positivity                                         |       |           |       |       |         |         |
| M1                                                                | 0.626 | 0.00179   | 0.602 | 0.587 | 0.00263 | 0.99877 |
| M1                                                                | 0.626 | 0.00128   | 0.809 | 0.333 | 0.00219 | 0.99896 |
| M2                                                                | 0.653 | 0.00180   | 0.613 | 0.622 | 0.00293 | 0.99888 |
| M2                                                                | 0.653 | 0.00128   | 0.806 | 0.389 | 0.00238 | 0.99910 |
| M3                                                                | 0.657 | 0.00172   | 0.615 | 0.622 | 0.00294 | 0.99888 |
| M3                                                                | 0.657 | 0.00125   | 0.806 | 0.395 | 0.00241 | 0.99911 |
| M4                                                                | 0.670 | 0.00178   | 0.612 | 0.652 | 0.00317 | 0.99892 |
| M4                                                                | 0.670 | 0.00122   | 0.808 | 0.399 | 0.00243 | 0.99913 |
| M5                                                                | 0.734 | 0.00183   | 0.607 | 0.753 | 0.00442 | 0.99906 |
| M5                                                                | 0.734 | 0.00116   | 0.801 | 0.480 | 0.00278 | 0.99925 |
| M6                                                                | 0.736 | 0.00183   | 0.600 | 0.753 | 0.00438 | 0.99904 |
| M6                                                                | 0.736 | 0.00115   | 0.806 | 0.480 | 0.00280 | 0.99927 |
| M7                                                                | 0.738 | 0.00185   | 0.600 | 0.753 | 0.00438 | 0.99904 |
| M7                                                                | 0.738 | 0.00111   | 0.804 | 0.470 | 0.00274 | 0.99925 |
| COVID-19 related mortality with inpatient test-confirmed COVID-19 |       |           |       |       |         |         |
| M1                                                                | 0.762 | 0.00066   | 0.603 | 0.786 | 0.00125 | 0.99977 |
| M1                                                                | 0.762 | 0.00033   | 0.808 | 0.594 | 0.00089 | 0.99986 |
| M2                                                                | 0.793 | 0.00065   | 0.603 | 0.803 | 0.00136 | 0.99978 |
| M2                                                                | 0.793 | 0.00035   | 0.815 | 0.652 | 0.00104 | 0.99987 |
| M3                                                                | 0.773 | 0.00055   | 0.609 | 0.769 | 0.00117 | 0.99977 |
| M3                                                                | 0.773 | 0.00030   | 0.808 | 0.608 | 0.00092 | 0.99986 |
| M4                                                                | 0.791 | 0.00063   | 0.603 | 0.813 | 0.00144 | 0.99978 |
| M4                                                                | 0.791 | 0.00032   | 0.801 | 0.652 | 0.00102 | 0.99986 |
| M5                                                                | 0.851 | 0.00090   | 0.609 | 0.914 | 0.00314 | 0.99981 |
| M5                                                                | 0.851 | 0.00035   | 0.808 | 0.745 | 0.00141 | 0.99989 |
| M6                                                                | 0.854 | 0.00083   | 0.623 | 0.904 | 0.00289 | 0.99981 |
| M6                                                                | 0.854 | 0.00036   | 0.808 | 0.753 | 0.00145 | 0.99989 |
| M7                                                                | 0.853 | 0.00084   | 0.616 | 0.905 | 0.00287 | 0.99981 |
| M7                                                                | 0.853 | 0.00034   | 0.808 | 0.743 | 0.00140 | 0.99988 |

M1: age at the pandemic; M2: age at the pandemic + PhenoAgeAccel at baseline; M3: age at the pandemic + pre-existing diseases or conditions at baseline; M4: age at the pandemic + pre-existing diseases or conditions to March 2020; M5: age at the pandemic + pre-existing diseases or conditions to March 2020 + PhenoAgeAccel at baseline; M6: age at the pandemic + pre-existing diseases or conditions to March 2020 + PhenoAgeAccel at baseline; M7: age at the pandemic + biomarkers in PhenoAge at baseline + pre-existing diseases or conditions to March 2020; Threshold: predicted probability threshold; SEN: sensitivity; SPEC: specificity; PPV: Positive Predictive Value; NPV: Negative Predictive Value

**Table S4.** Mediation analysis results for the mediation effects of incident diseases and comorbidities on the effect of accelerated aging (PhenoAgeAccel > 0) on test positivity restricted to inpatient positives

| Mediator                    | Effect Decomposition | Estimate | 2.5%     | 97.5%   | P-Value |
|-----------------------------|----------------------|----------|----------|---------|---------|
| Comorbidities               | ACME                 | 1.1E-04  | 8.4E-05  | 0.0E+00 | <2e-16  |
| Comorbidities               | ADE                  | 4.0E-04  | 8.4E-05  | 0.0E+00 | 0.016   |
| Comorbidities               | Prop. Mediated       | 0.22     | 0.13     | 0.54    | <2e-16  |
| Asthma                      | ACME                 | 1.3E-05  | 3.2E-06  | 0.0E+00 | <2e-16  |
| Asthma                      | ADE                  | 5.9E-04  | 2.7E-04  | 0.0E+00 | <2e-16  |
| Asthma                      | Prop. Mediated       | 0.02     | 0.01     | 0.06    | <2e-16  |
| Atrial Fibrillation         | ACME                 | 1.2E-05  | 3.4E-06  | 0.0E+00 | <2e-16  |
| Atrial Fibrillation         | ADE                  | 5.9E-04  | 2.1E-04  | 0.0E+00 | <2e-16  |
| Atrial Fibrillation         | Prop. Mediated       | 0.02     | 0.01     | 0.06    | <2e-16  |
| Chronic Kidney Disease      | ACME                 | 3.3E-05  | 8.8E-06  | 0.0E+00 | <2e-16  |
| Chronic Kidney Disease      | ADE                  | 5.8E-04  | 2.6E-04  | 0.0E+00 | <2e-16  |
| Chronic Kidney Disease      | Prop. Mediated       | 0.05     | 0.01     | 0.13    | <2e-16  |
| COPD                        | ACME                 | 2.3E-05  | 4.0E-06  | 0.0E+00 | 0.012   |
| COPD                        | ADE                  | 5.8E-04  | 2.5E-04  | 0.0E+00 | 0.004   |
| COPD                        | Prop. Mediated       | 0.04     | 0.01     | 0.10    | 0.016   |
| Coronary Artery Disease     | ACME                 | 1.0E-06  | -6.1E-06 | 0.0E+00 | 0.92    |
| Coronary Artery Disease     | ADE                  | 5.8E-04  | 2.2E-04  | 0.0E+00 | <2e-16  |
| Coronary Artery Disease     | Prop. Mediated       | 7.2E-04  | -1.6E-02 | 2.0E-02 | 0.92    |
| Delirium                    | ACME                 | 1.5E-05  | 3.5E-06  | 0.0E+00 | <2e-16  |
| Delirium                    | ADE                  | 5.8E-04  | 2.2E-04  | 0.0E+00 | <2e-16  |
| Delirium                    | Prop. Mediated       | 0.02     | 0.01     | 0.08    | <2e-16  |
| Dementia                    | ACME                 | 8.6E-07  | -2.5E-05 | 0.0E+00 | 0.95    |
| Dementia                    | ADE                  | 5.9E-04  | 2.2E-04  | 0.0E+00 | <2e-16  |
| Dementia                    | Prop. Mediated       | 1.5E-03  | -5.7E-02 | 5.0E-02 | 0.95    |
| Depression                  | ACME                 | 3.1E-06  | -4.4E-06 | 0.0E+00 | 0.66    |
| Depression                  | ADE                  | 5.9E-04  | 2.3E-04  | 0.0E+00 | <2e-16  |
| Depression                  | Prop. Mediated       | 3.2E-03  | -8.0E-03 | 4.0E-02 | 0.66    |
| Falls or Fragility Fracture | ACME                 | 1.3E-05  | 4.9E-06  | 0.0E+00 | 0.004   |
| Falls or Fragility Fracture | ADE                  | 5.7E-04  | 2.0E-04  | 0.0E+00 | <2e-16  |
| Falls or Fragility Fracture | Prop. Mediated       | 0.02     | 0.01     | 0.06    | 0.004   |
| Hypertension                | ACME                 | 5.1E-05  | 2.8E-05  | 0.0E+00 | <2e-16  |
| Hypertension                | ADE                  | 5.3E-04  | 1.9E-04  | 0.0E+00 | 0.004   |
| Hypertension                | Prop. Mediated       | 0.09     | 0.04     | 0.22    | <2e-16  |
| Liver Disease               | ACME                 | 1.8E-05  | 3.6E-06  | 0.0E+00 | <2e-16  |
| Liver Disease               | ADE                  | 5.8E-04  | 2.4E-04  | 0.0E+00 | <2e-16  |
| Liver Disease               | Prop. Mediated       | 0.03     | 0.01     | 0.08    | <2e-16  |

|                      |                |          |          |         |        |
|----------------------|----------------|----------|----------|---------|--------|
| Osteoarthritis       | ACME           | 4.4E-06  | -7.0E-06 | 0.0E+00 | 0.55   |
| Osteoarthritis       | ADE            | 8.4E-04  | 5.3E-04  | 0.0E+00 | <2e-16 |
| Osteoarthritis       | Prop. Mediated | 5.2E-03  | -8.5E-03 | 2.0E-02 | 0.55   |
| Pneumonia            | ACME           | 4.6E-05  | 2.5E-05  | 0.0E+00 | <2e-16 |
| Pneumonia            | ADE            | 5.5E-04  | 2.1E-04  | 0.0E+00 | <2e-16 |
| Pneumonia            | Prop. Mediated | 0.08     | 0.04     | 0.19    | <2e-16 |
| Rheumatoid Arthritis | ACME           | 8.3E-07  | -2.7E-06 | 0.0E+00 | 0.8    |
| Rheumatoid Arthritis | ADE            | 6.0E-04  | 2.6E-04  | 0.0E+00 | <2e-16 |
| Rheumatoid Arthritis | Prop. Mediated | -7.4E-04 | -5.6E-03 | 2.0E-02 | 0.8    |
| Stroke               | ACME           | 9.3E-06  | 1.8E-06  | 0.0E+00 | <2e-16 |
| Stroke               | ADE            | 5.7E-04  | 2.4E-04  | 0.0E+00 | <2e-16 |
| Stroke               | Prop. Mediated | 0.01     | 0.00     | 0.05    | <2e-16 |
| Type II Diabetes     | ACME           | 7.5E-05  | 3.3E-05  | 0.0E+00 | <2e-16 |
| Type II Diabetes     | ADE            | 5.0E-04  | 1.4E-04  | 0.0E+00 | 0.008  |
| Type II Diabetes     | Prop. Mediated | 0.13     | 0.05     | 0.36    | 0.004  |

ACME: average causal mediation effects; ADE: average direct effects; Prop. Mediated: proportion mediated:  $ACME / \text{total effect} = ACME / (ACME + ADE)$

**Table S5.** Mediation analysis results for the mediation effects of incident diseases and comorbidities on the effect of accelerated aging (PhenoAgeAccel > 0) on mortality with inpatient test-confirmed COVID-19

| Mediator                    | Effect Decomposition | Estimate | 2.5%     | 97.5%   | P-Value |
|-----------------------------|----------------------|----------|----------|---------|---------|
| Comorbidities               | ACME                 | 3.6E-05  | 2.2E-05  | 0.0E+00 | <2e-16  |
| Comorbidities               | ADE                  | 1.6E-04  | -1.8E-05 | 0.0E+00 | 0.08    |
| Comorbidities               | Prop. Mediated       | 0.18     | 0.07     | 1.03    | 0.028   |
| Asthma                      | ACME                 | 3.6E-06  | -4.6E-07 | 0.0E+00 | 0.188   |
| Asthma                      | ADE                  | 2.3E-04  | 5.7E-05  | 0.0E+00 | 0.028   |
| Asthma                      | Prop. Mediated       | 0.01     | 0.00     | 0.09    | 0.204   |
| Atrial Fibrillation         | ACME                 | 2.5E-06  | -1.2E-06 | 0.0E+00 | 0.284   |
| Atrial Fibrillation         | ADE                  | 2.2E-04  | 3.6E-05  | 0.0E+00 | 0.028   |
| Atrial Fibrillation         | Prop. Mediated       | 7.3E-03  | -5.9E-03 | 7.0E-02 | 0.312   |
| Chronic Kidney Disease      | ACME                 | 7.9E-06  | -2.4E-06 | 0.0E+00 | 0.272   |
| Chronic Kidney Disease      | ADE                  | 2.3E-04  | 4.1E-05  | 0.0E+00 | 0.016   |
| Chronic Kidney Disease      | Prop. Mediated       | 0.02     | -0.01    | 0.18    | 0.28    |
| COPD                        | ACME                 | 1.5E-05  | 1.8E-06  | 0.0E+00 | 0.016   |
| COPD                        | ADE                  | 2.2E-04  | 2.8E-05  | 0.0E+00 | 0.02    |
| COPD                        | Prop. Mediated       | 0.06     | 0.01     | 0.38    | 0.024   |
| Coronary Artery Disease     | ACME                 | 4.0E-07  | -4.1E-06 | 0.0E+00 | 0.9     |
| Coronary Artery Disease     | ADE                  | 2.2E-04  | 3.3E-05  | 0.0E+00 | 0.02    |
| Coronary Artery Disease     | Prop. Mediated       | -1.0E-03 | -4.6E-02 | 4.0E-02 | 0.92    |
| Delirium                    | ACME                 | 8.8E-06  | 6.3E-07  | 0.0E+00 | 0.028   |
| Delirium                    | ADE                  | 2.2E-04  | 2.0E-05  | 0.0E+00 | 0.04    |
| Delirium                    | Prop. Mediated       | 0.03     | 0.00     | 0.16    | 0.056   |
| Dementia                    | ACME                 | 7.4E-07  | -2.1E-05 | 0.0E+00 | 0.96    |
| Dementia                    | ADE                  | 2.4E-04  | 5.6E-05  | 0.0E+00 | 0.016   |
| Dementia                    | Prop. Mediated       | 2.2E-03  | -1.6E-01 | 1.2E-01 | 0.96    |
| Depression                  | ACME                 | 1.9E-06  | -2.0E-06 | 0.0E+00 | 0.852   |
| Depression                  | ADE                  | 2.2E-04  | 1.9E-05  | 0.0E+00 | 0.024   |
| Depression                  | Prop. Mediated       | 1.1E-03  | -8.6E-03 | 1.4E-01 | 0.868   |
| Falls or Fragility Fracture | ACME                 | 7.1E-06  | 7.9E-07  | 0.0E+00 | 0.028   |
| Falls or Fragility Fracture | ADE                  | 2.1E-04  | 2.2E-05  | 0.0E+00 | 0.02    |
| Falls or Fragility Fracture | Prop. Mediated       | 0.03     | 0.00     | 0.19    | 0.048   |
| Hypertension                | ACME                 | 1.9E-05  | 5.7E-06  | 0.0E+00 | <2e-16  |
| Hypertension                | ADE                  | 2.0E-04  | 7.5E-06  | 0.0E+00 | 0.032   |
| Hypertension                | Prop. Mediated       | 0.08     | 0.02     | 0.46    | 0.024   |
| Liver Disease               | ACME                 | -2.0E-06 | -3.1E-06 | 0.0E+00 | <2e-16  |
| Liver Disease               | ADE                  | 2.3E-04  | 5.4E-05  | 0.0E+00 | 0.008   |
| Liver Disease               | Prop. Mediated       | -8.5E-03 | -3.9E-02 | 0.0E+00 | 0.008   |

|                      |                |          |          |         |        |
|----------------------|----------------|----------|----------|---------|--------|
| Osteoarthritis       | ACME           | 1.9E-06  | -7.5E-07 | 0.0E+00 | 0.408  |
| Osteoarthritis       | ADE            | 2.2E-04  | 2.2E-05  | 0.0E+00 | 0.036  |
| Osteoarthritis       | Prop. Mediated | 4.9E-03  | -4.8E-03 | 7.0E-02 | 0.428  |
| Pneumonia            | ACME           | 1.9E-05  | 6.4E-06  | 0.0E+00 | <2e-16 |
| Pneumonia            | ADE            | 2.1E-04  | 3.0E-05  | 0.0E+00 | 0.008  |
| Pneumonia            | Prop. Mediated | 0.08     | 0.03     | 0.41    | 0.008  |
| Rheumatoid Arthritis | ACME           | -6.3E-07 | -1.3E-06 | 0.0E+00 | 0.008  |
| Rheumatoid Arthritis | ADE            | 2.3E-04  | 5.0E-05  | 0.0E+00 | 0.004  |
| Rheumatoid Arthritis | Prop. Mediated | -2.7E-03 | -1.3E-02 | 0.0E+00 | 0.012  |
| Stroke               | ACME           | 4.3E-06  | -1.8E-07 | 0.0E+00 | 0.08   |
| Stroke               | ADE            | 2.2E-04  | 4.7E-05  | 0.0E+00 | 0.02   |
| Stroke               | Prop. Mediated | 0.01     | 0.00     | 0.12    | 0.1    |
| Type II Diabetes     | ACME           | 2.0E-05  | 1.3E-06  | 0.0E+00 | 0.02   |
| Type II Diabetes     | ADE            | 2.1E-04  | -1.0E-05 | 0.0E+00 | 0.056  |
| Type II Diabetes     | Prop. Mediated | 0.08     | 0.00     | 0.49    | 0.048  |

ACME: average causal mediation effects; ADE: average direct effects; Prop. Mediated: proportion mediated:  $ACME / \text{total effect} = ACME / (ACME + ADE)$



**Figure S1.** Boxplots and violin plots of PhenoAge acceleration by sex, ethnicity, inpatient test positivity status, or status of COVID-19 related mortality with inpatient test-confirmed COVID-19

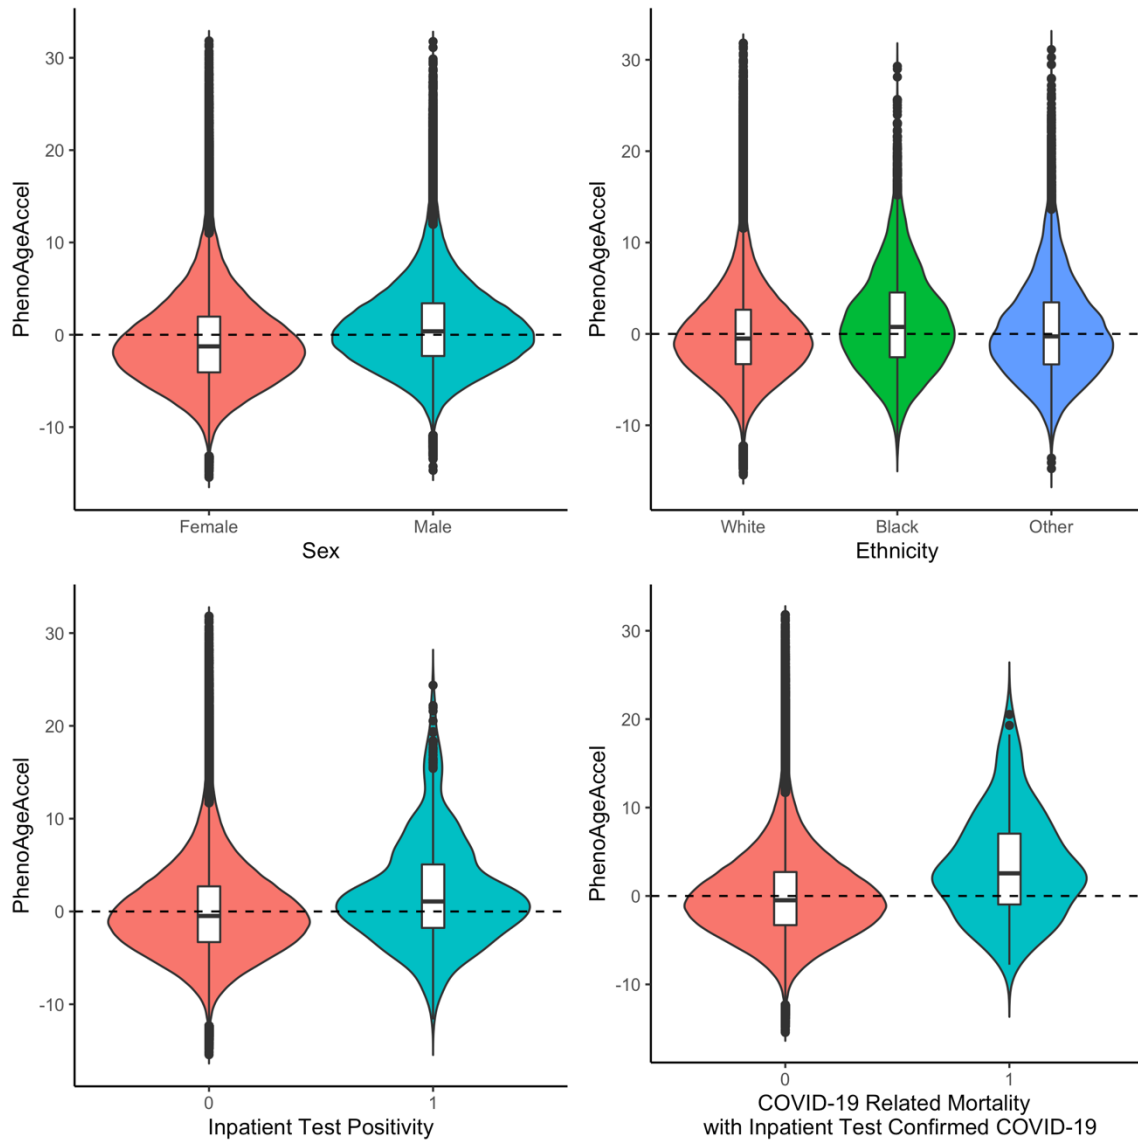

**Figure S2.** Boxplots and violin plots of PhenoAge acceleration by disease status updated to March 2020: delirium, dementia, depression, atrial fibrillation, delirium, hypertension

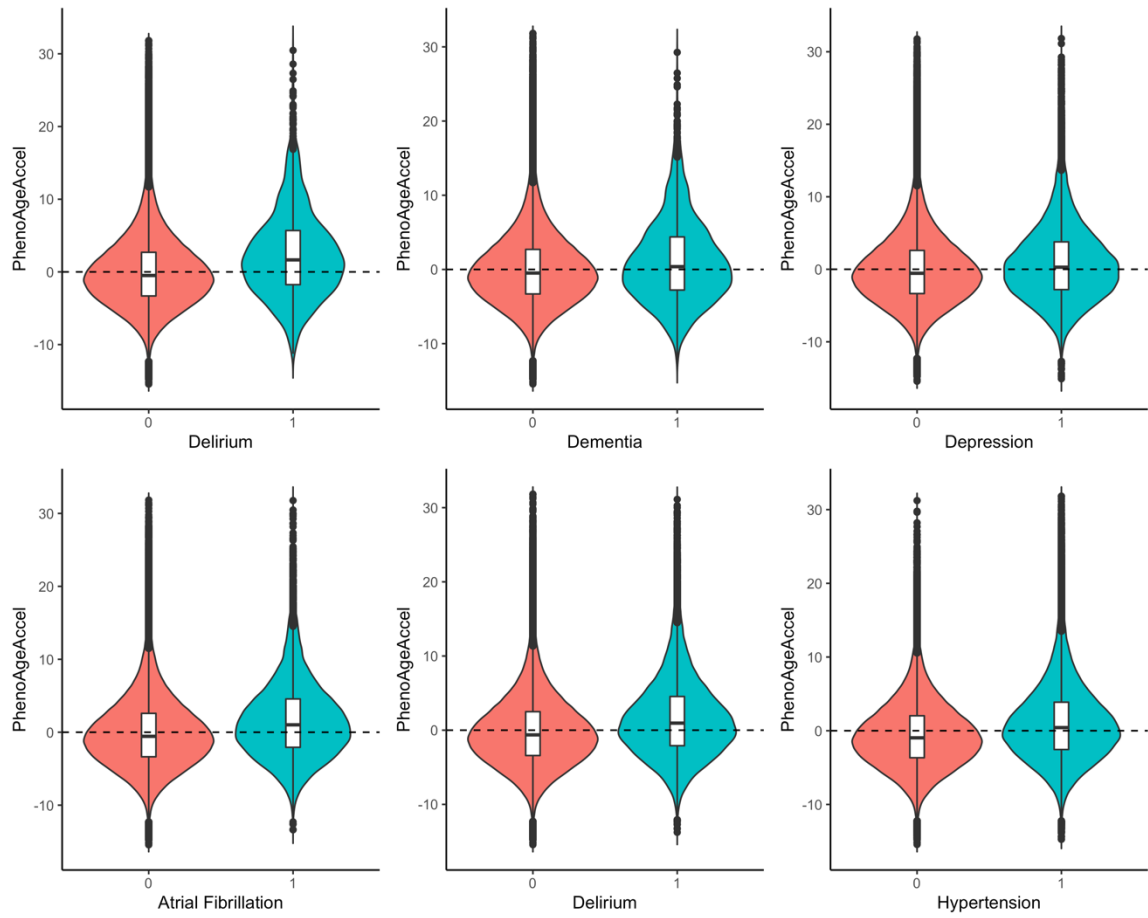

**Figure S3.** Boxplots and violin plots of PhenoAge acceleration by disease status updated to March 2020: stroke, type II diabetes, liver disease, osteoarthritis, rheumatoid Arthritis, chronic kidney disease

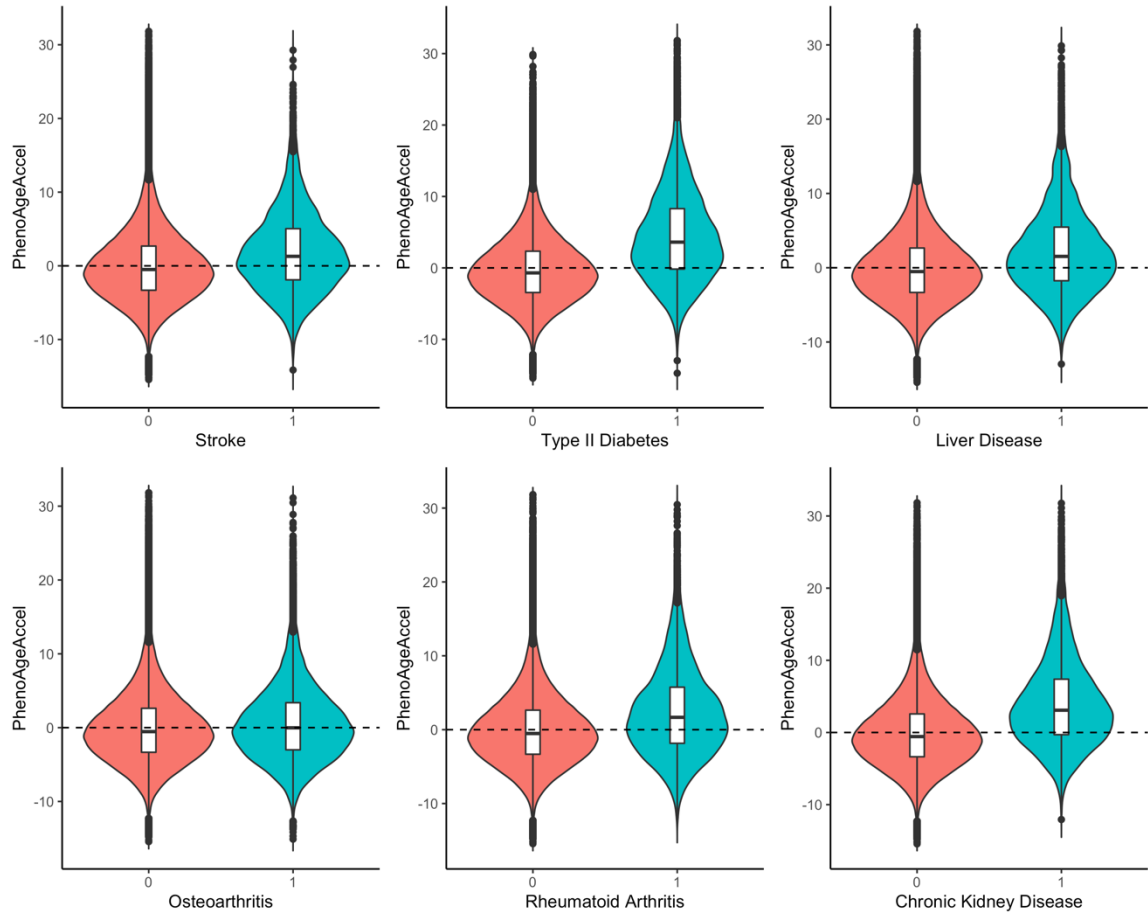

**Figure S4.** Boxplots and violin plots of PhenoAge acceleration by disease status updated to March 2020: asthma, COPD, pneumonia, falls/fragility fracture

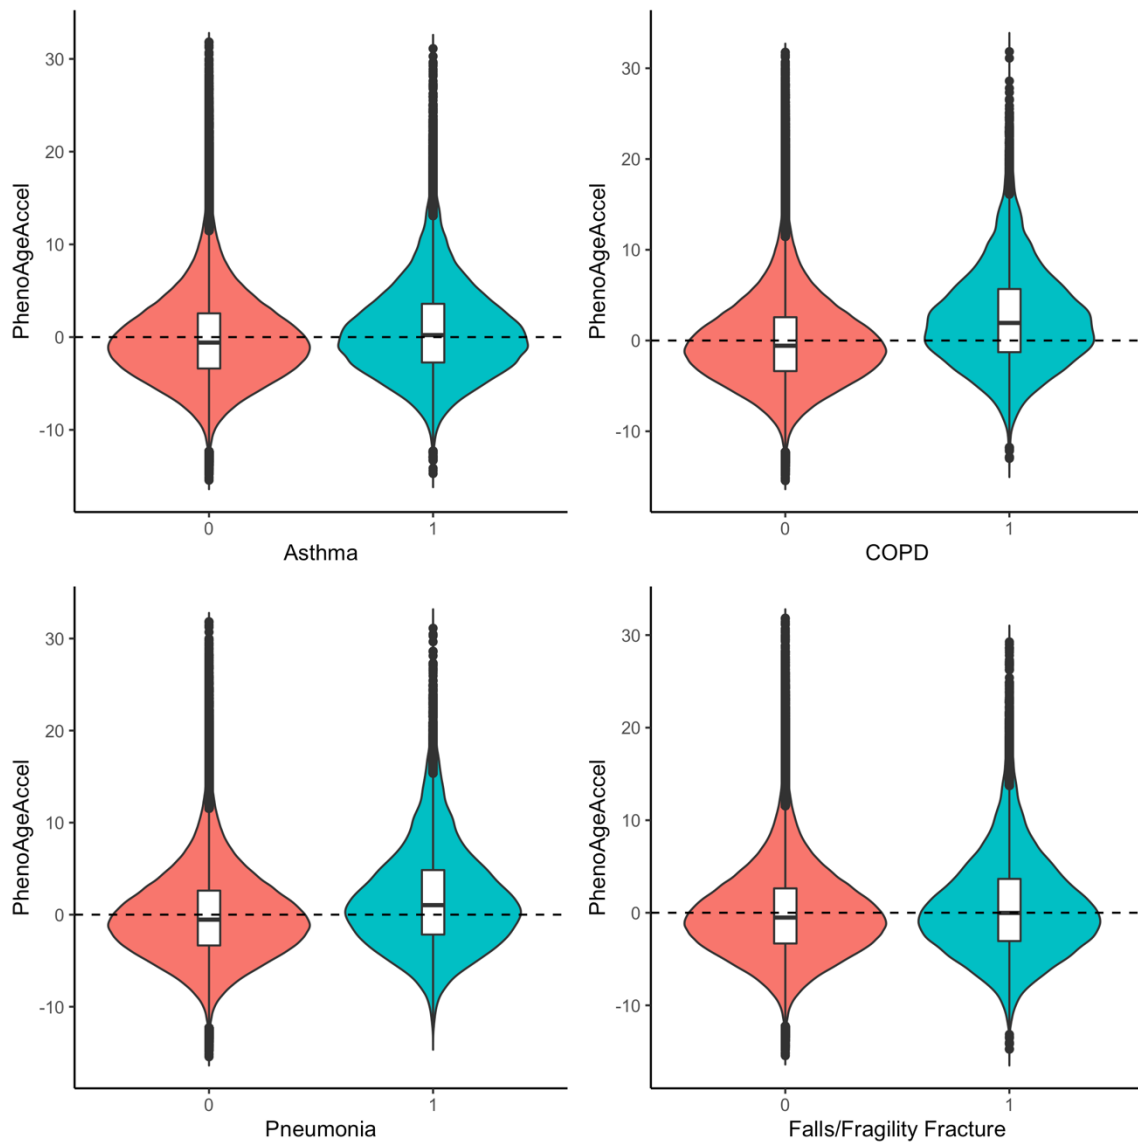

Supplement: glab060_suppl_supplementary_information.pdf [file glab060_suppl_supplementary_information.pdf]
